# Supplementary material for: CALR frameshift mutations in MPN patient-derived iPSCs accelerate maturation of megakaryocytes
Source: PubMed Central journal article supplement — Stem Cell Reports. 2021 Oct 21;16(11):2768–83. doi: 10.1016/j.stemcr.2021.09.019 (PMC8581168; doi:10.1016/j.stemcr.2021.09.019), 2021-10-21
Supplement: mmc1.pdf [file mmc1.pdf]

**Supplemental Information**

**CALR frameshift mutations in MPN patient-derived iPSCs accelerate maturation of megakaryocytes**

**Kathrin Olschok, Lijuan Han, Marcelo A.S. de Toledo, Janik Böhnke, Martin Graßhoff, Ivan G. Costa, Alexandre Theocharides, Angela Maurer, Herdit M. Schüler, Eva Miriam Buhl, Kristina Pannen, Julian Baumeister, Milena Kalmer, Siddharth Gupta, Peter Boor, Deniz Gezer, Tim H. Brümmendorf, Martin Zenke, Nicolas Chatain, and Steffen Koschmieder**

# Supplemental Information

## CALR frameshift mutations in MPN patient-derived iPSCs accelerate maturation of megakaryocytes

Kathrin Olschok<sup>1,2,\*</sup>, Lijuan Han<sup>1,2,3,\*</sup>, Marcelo A. S. de Toledo<sup>1,2</sup>, Janik Böhnke<sup>4,5</sup>, Martin Graßhoff<sup>6</sup>, Ivan G. Costa<sup>6</sup>, Alexandre Theocharides<sup>7</sup>, Angela Maurer<sup>1,2</sup>, Herdit M. Schüler<sup>8</sup>, Eva Miriam Buhl<sup>9</sup>, Kristina Pannen<sup>1,2</sup>, Julian Baumeister<sup>1,2</sup>, Milena Kalmer<sup>1,2</sup>, Siddharth Gupta<sup>1,2</sup>, Peter Boor<sup>9</sup>, Deniz Gezer<sup>1,2</sup>, Tim H. Brümmendorf<sup>1,2</sup>, Martin Zenke<sup>4,5</sup>, Nicolas Chatain<sup>1,2,#</sup> & Steffen Koschmieder<sup>1,2,#</sup>

<sup>1</sup>Department of Hematology, Oncology, Hemostaseology, and Stem Cell Transplantation, Faculty of Medicine, RWTH Aachen University, Aachen, Germany

<sup>2</sup>Center for Integrated Oncology Aachen Bonn Cologne Düsseldorf (CIO ABCD)

<sup>3</sup>Department of Oncology, The First Affiliated Hospital of Zhengzhou University, Zhengzhou, China

<sup>4</sup>Institute for Biomedical Engineering, Department of Cell Biology, Faculty of Medicine, RWTH Aachen University, Aachen, Germany

<sup>5</sup>Helmholtz Institute for Biomedical Engineering, RWTH Aachen University, Aachen, Germany

<sup>6</sup>Institute for Computational Genomics Joint Research Center for Computational Biomedicine, Faculty of Medicine, RWTH Aachen University, Aachen, Germany

<sup>7</sup>Division of Hematology, University Hospital Zurich and University of Zurich, Zurich, Switzerland

<sup>8</sup>Institute for Human Genetics, Faculty of Medicine, RWTH Aachen University, Aachen, Germany

<sup>9</sup>Institute for Pathology, Electron Microscopy Facility, Faculty of Medicine, RWTH Aachen University, Aachen, Germany

\*These authors contributed equally

#Co-senior authors

**Correspondence:** Prof. Dr. med. Steffen Koschmieder, Department of Hematology, Oncology, Hemostaseology, and Stem Cell Transplantation, Faculty of Medicine, RWTH Aachen University, Pauwelsstr. 30, D-52074 Aachen, Germany, Phone: +49-241-8036102; E-mail: [skoschmieder@ukaachen.de](mailto:skoschmieder@ukaachen.de)

# Supplemental Information

## 1. Supplemental Figures

**Figure S1.** Proof of CRISPR/Cas9 engineered *CALR* WT clones.

**Figure S2.** Gating strategy and impact of *CALR* mutations on HSPCs proliferation

**Figure S3.** Impact of *CALR* mutations on MKs proliferation capacity and on erythrocytic cell development

**Figure S4.** Immunofluorescence staining to determine wild type and mutant *CALR* distribution in the cell

**Figure S5.** Gene ontology (GO) analysis of *CALR*<sup>Rins5</sup>-mutated iPSC-derived MKs

## 2. Supplemental Tables

**Table S1.** Generation of MPN patient-derived *CALR* iPSCs

**Table S2.** CRISPR guide RNAs (gRNAs) to repair homozygous *CALR* mutations with CRISPR/Cas9

**Table S3.** Donor template to repair homozygous *CALR* mutations with CRISPR/Cas9

**Table S4.** NGS Data of patient-derived *CALR* iPSCs and Healthy donor

**Table S5.** List of antibodies used for flow cytometry

**Table S6.** List of primary and secondary antibodies used for Western blot and Immunofluorescence

**Table S7.** List of primers used for RT-qPCR and *CALR* genotyping PCR

**Table S8.** Medium composition

## 3. Supplemental Experimental Procedures

-Next generation sequencing

-Cytogenetic analysis

-Immunofluorescence staining

-RNA isolation and RT-qPCR

-SDS-Page and Western blot

-Undirected hematopoietic differentiation of iPSCs into hematopoietic progenitors and myeloid subsets with the “EB-based” protocol

-Differentiation of iPSCs into hematopoietic stem cells and myeloid subsets with the “spin-EB” protocol

-Cell morphology analysis

-MPO cytochemical staining

-Flow cytometry analysis

-CRISPR/Cas9-mediated repair of homozygous *CALR*<sup>Rins5</sup> and *CALR*<sup>del52</sup> mutation in iPSCs

-Purification of CD34<sup>+</sup> HSPCs and CD61<sup>+</sup> megakaryocytes by magnetic activated cell sorting

-Colony-forming unit assay of CD34<sup>+</sup> HSPCs

-Transmission electron microscopy

-Preparation of samples for RNA Sequencing

1. Supplemental Figures  
Figure S1.

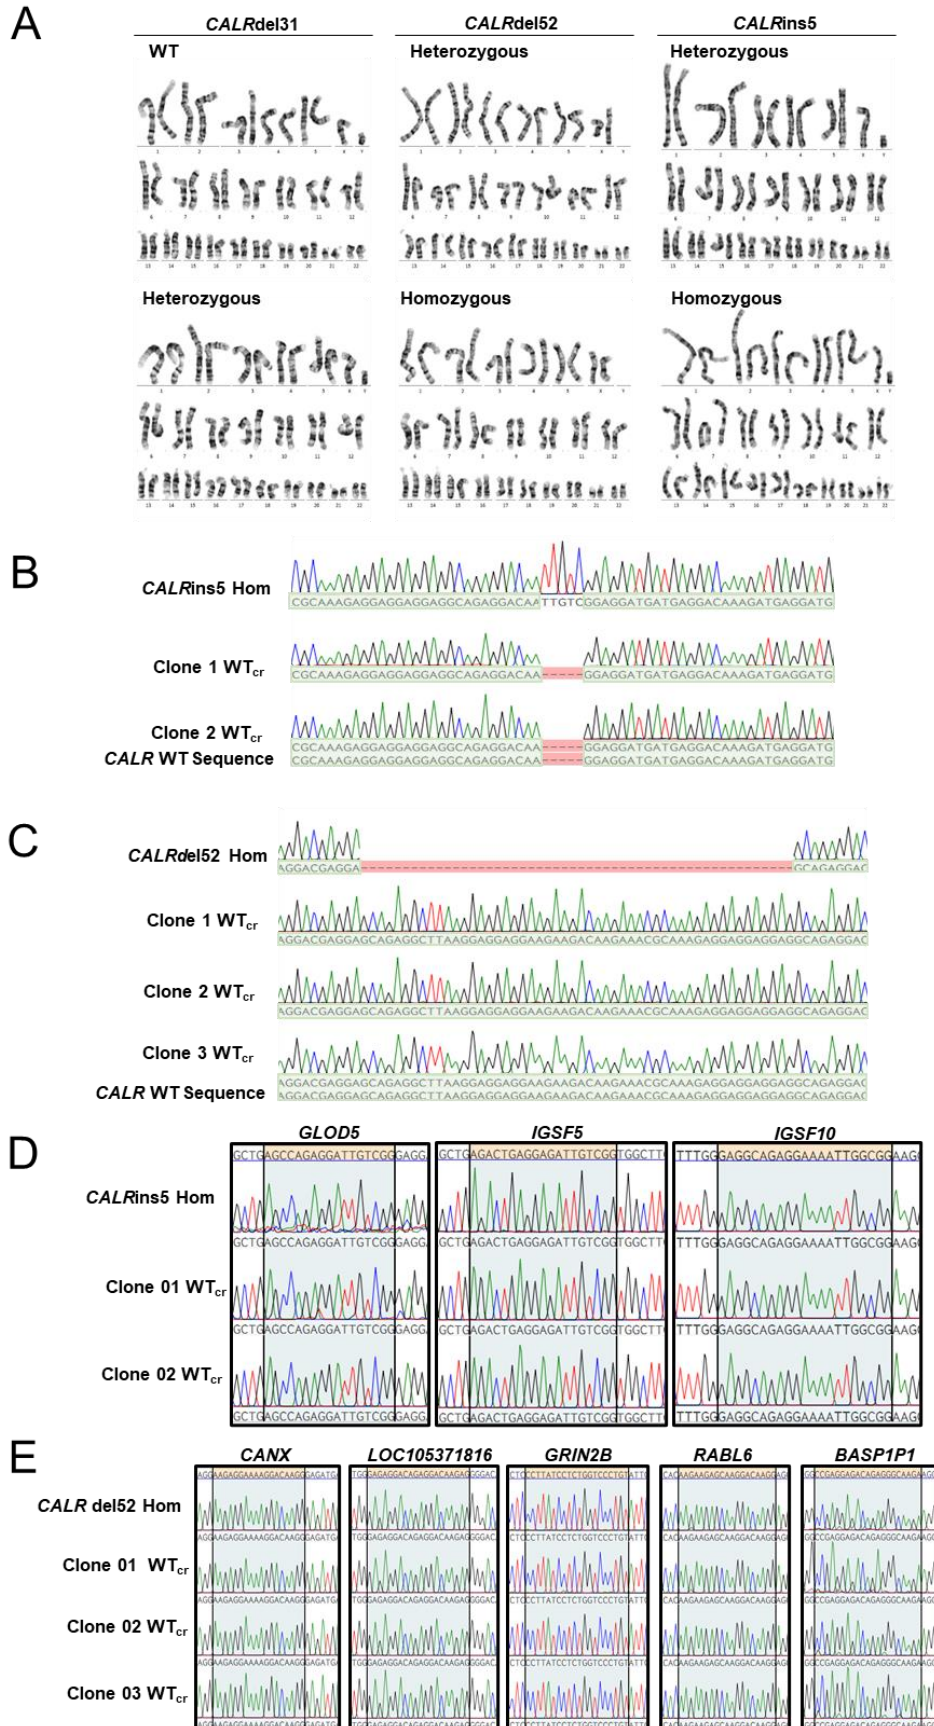

**Figure S1. Proof of CRISPR/Cas9 engineered CALR WT clones. Related to Figure 1.**

**A.** Karyotype analysis of patient-derived iPSC clones. **B.** Sequence alignment of maternal homozygous *CALR*<sub>Rins5</sub> clone with resulting WT<sub>cr</sub> clones 01 and 02 to reference CALR WT sequence. Successful alignment and mismatch are shown in green and red, respectively. **C.** Sequence alignment of maternal homozygous *CALR*<sub>del52</sub> clone with resulting WT<sub>cr</sub> clones 01, 02, and 03 to reference CALR WT sequence. Successful alignment and mismatch are shown in green and red, respectively. **D.** and **E.** Exclusion of possible off-target effects caused by CRISPR/Cas9 gene editing for *CALR* mutations. List of off-targets was provided by IDT Systems. To verify off-target sites, regions of interest were amplified by PCR and Sanger sequenced. Sequence alignment of maternal homozygous *CALR*<sub>Rins5</sub> clone (**D**) and resulting WT<sub>cr</sub> clones 01 and 02 for possible off-targets in *GLOD5*, *IGSF5*, and *IGSF10*. Regions of interest are highlighted in orange/grey. Sequence alignment of maternal homozygous *CALR*<sub>del52</sub> clone (**E**) and resulting WT<sub>cr</sub> clones 01, 02, and 03 for possible off-targets in *CANX*, *LOC105371816*, *GRIN2B*, *RABL6*, and *BASP1P1*. Regions of interest are highlighted in orange/grey.

Figure S2.

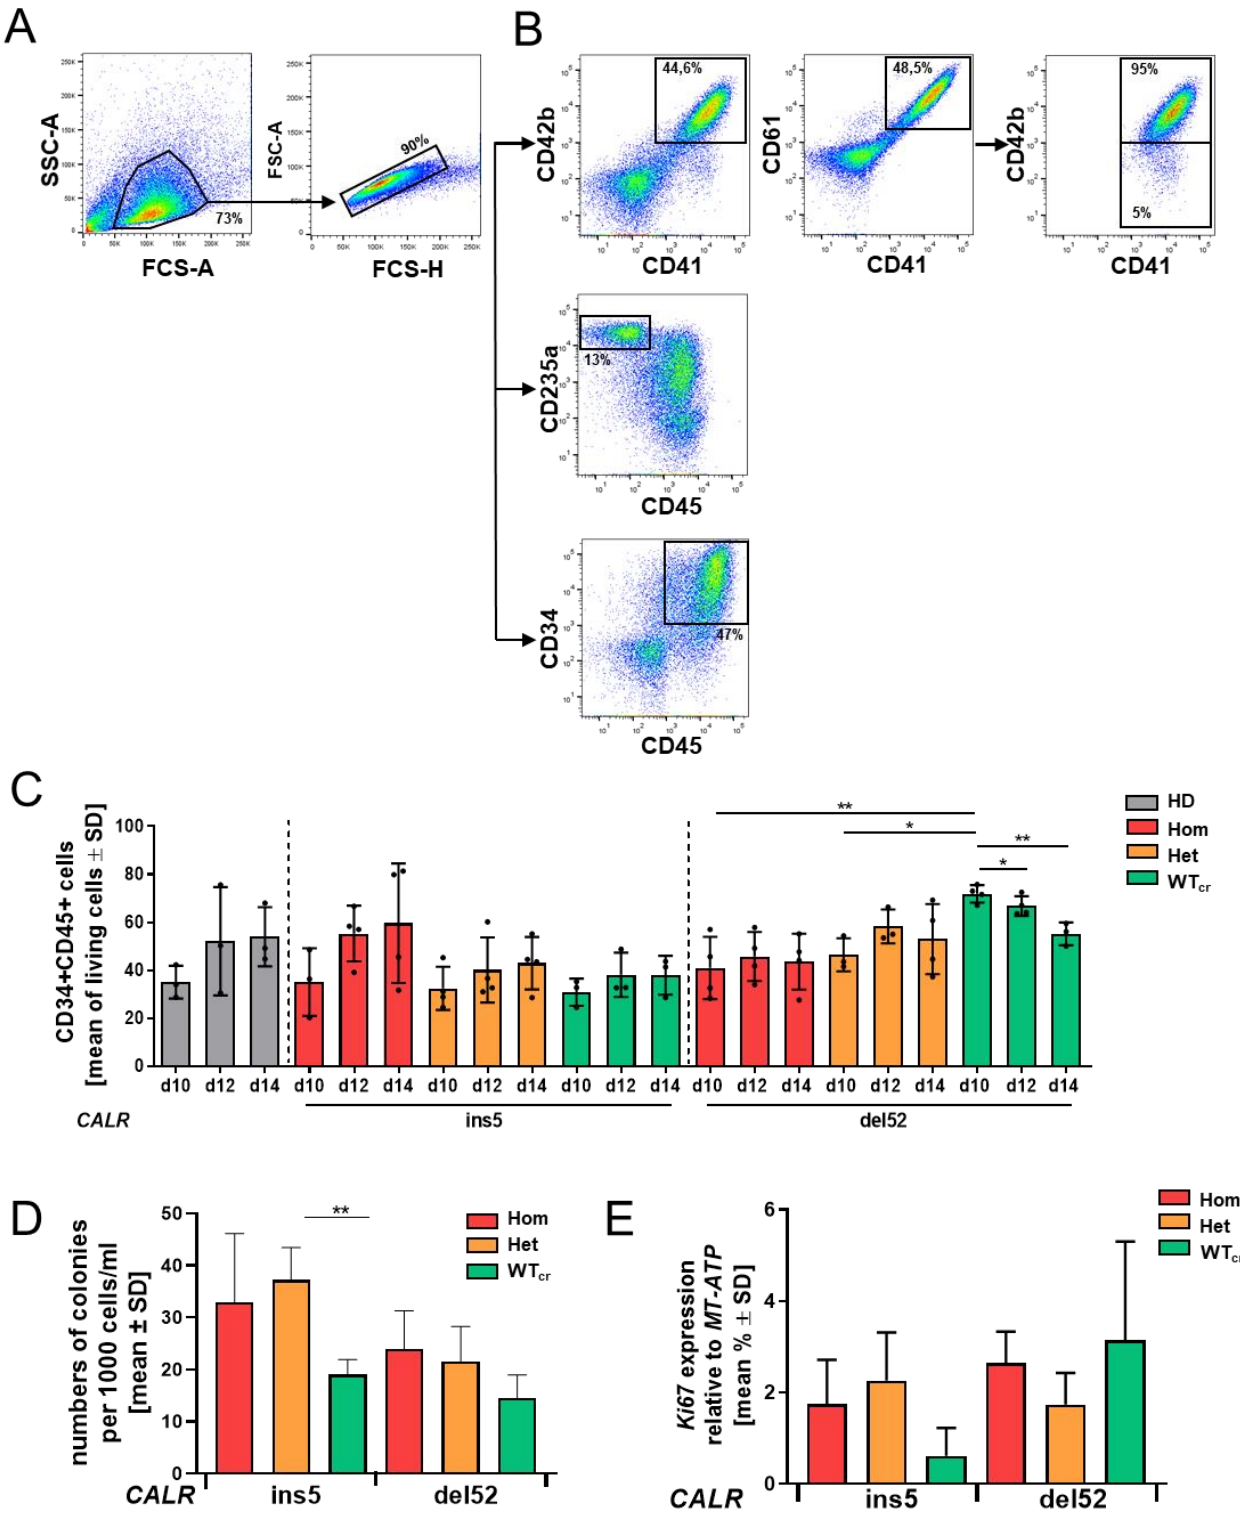

**Figure S2. Gating strategy and impact of CALR mutations on HSPCs proliferation. Related to Figure 3 and Figure 4.**

**A.** Flow cytometry analysis gating strategy to identify myeloid cell populations in „spin-EB“ differentiation protocol. Living cells were first gated on forwards scatter (FSC-A)/side scatter (SSC-A) and further gated on single cells. **B.** Mature and immature MKs were identified by CD42b+CD41+ and CD61+CD41+, respectively. Erythroid cells were discriminated by CD235a+CD45- expression and HSPCs were determined by CD34+CD45+ expression. Numbers represent frequencies of indicated populations in percentage of living cells. **C.** Percentage of CD34+CD45+ cells on day 10, day 12 and day 14 of „spin-EB“ differentiation analyzed by flow cytometry analysis. Each data point represents an independent experiment for each *CALR* genotype and HD control shown as mean values  $\pm$  SD, \* $p < 0.05$ , \*\* $p < 0.01$ ,  $n = 3-4$  independent experiments. **D.** Number of colonies counted from colony forming unit assay. Statistics was calculated by comparing mutated cells to corresponding WT<sub>cr</sub> cells. Data are shown as mean values  $\pm$  SD, \*\* $p > 0.01$ ,  $n = 3-5$  independent differentiation experiments. **E.** Gene expression of the proliferative marker *Ki67* measured in iPS-derived HSPC in RT-qPCR. Data are shown for three independent experiments ( $n = 3$ ) with indicated *CALR* genotype. Gene expression was normalized to *MT-ATP6* expression and is represented as mean values  $\pm$  SD.

Figure S3.

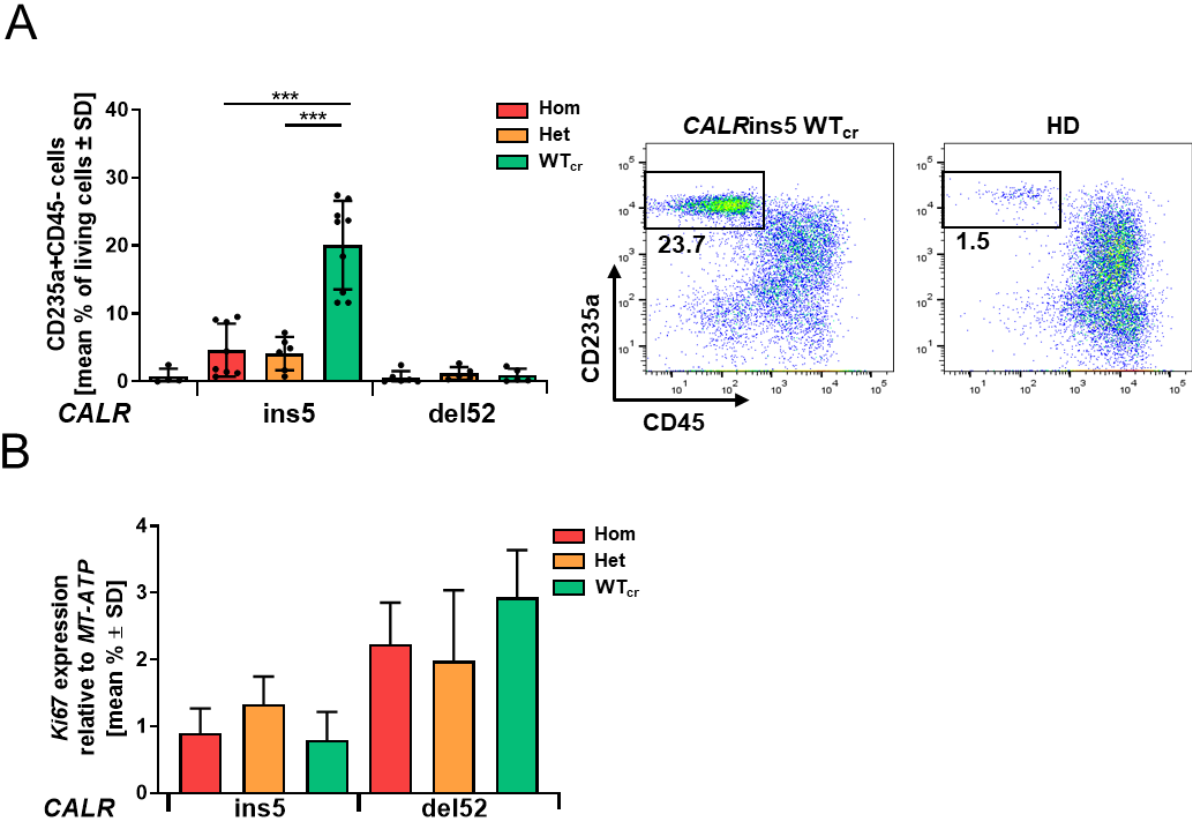

**Figure S3. Impact of CALR mutations on MKs proliferation capacity and on erythrocytic cell development. Related to Figure 4.**

**A.** Percentage of CD235a+CD45- erythroid cells determined by flow cytometry on day 14 of “spin-EB” differentiation. Number of independent experiments performed for each CALR genotype and HD control referred to number of data points shown,  $n=4-9$ . Flow cytometry plots to determine erythroid cell population (CD235a+CD45-) are exemplarily shown for CALRins5 WT<sub>cr</sub> cells and healthy controls. Numbers represent frequencies of indicated populations in percentage of living cells as mean values ± SD.  $***p<0.001$ . **B.** Gene expression of the proliferative marker *Ki67* measured in iPS-derived MKs in RT-qPCR. Data are shown for three independent experiments ( $n=3$ ) with indicated CALR genotype. Gene expression was normalized to *MT-ATP6* expression and are shown as mean values ± SD.



Figure S4.

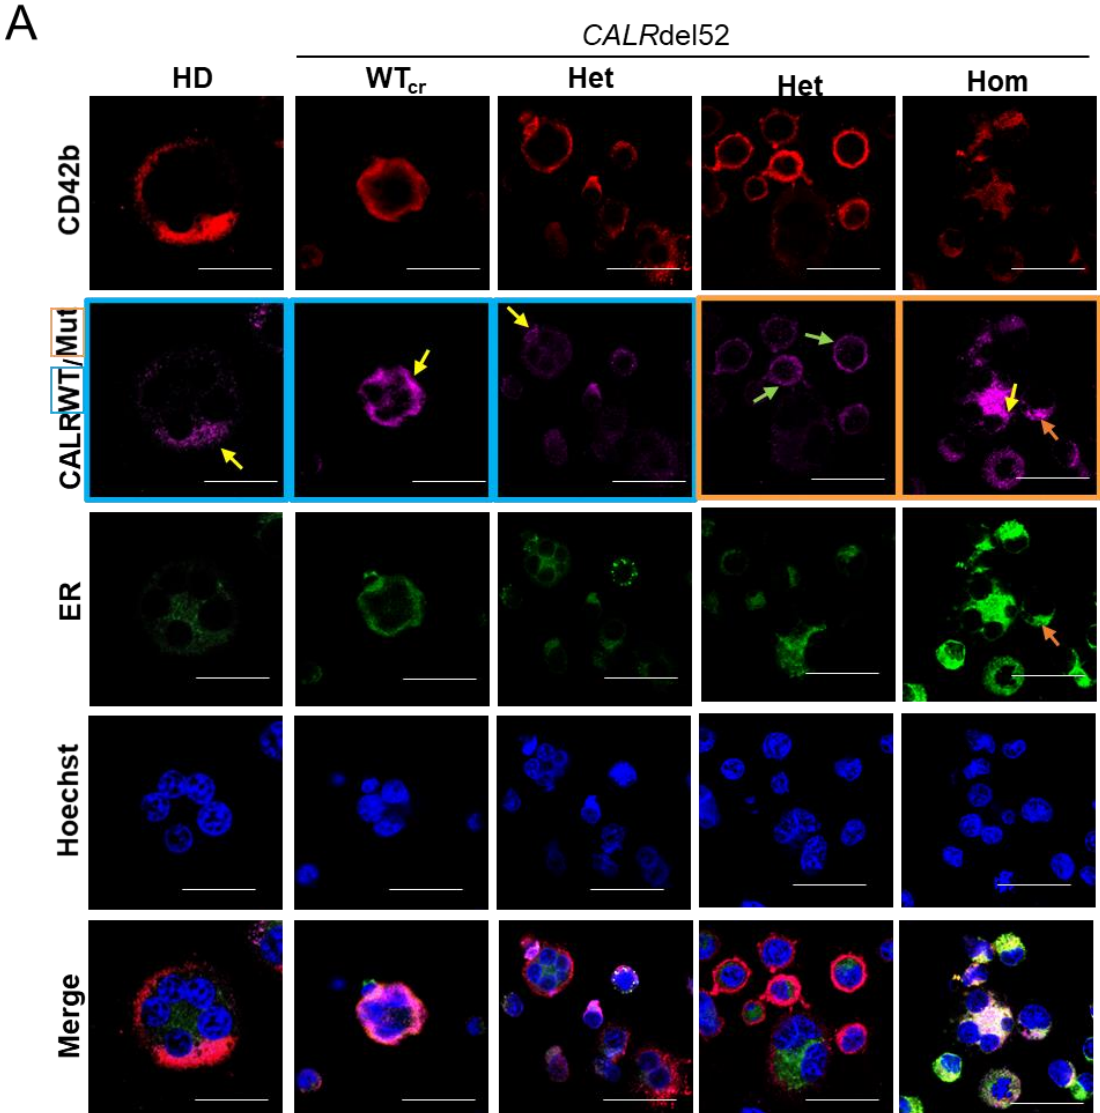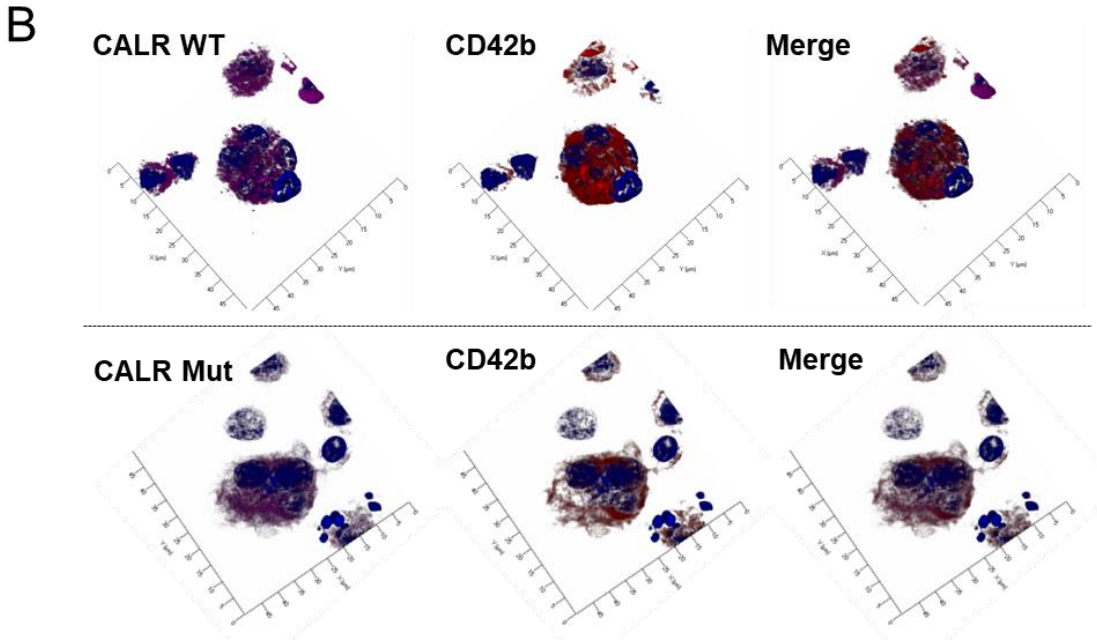

**Figure S4. Immunofluorescence staining to determine wild type and mutant CALR distribution in the cell. Related to Figure 6.**

**A.** iPSC-derived MKs were fixed and stained for the endoplasmic reticulum (ER) and wild type (WT) CALR or mutated (Mut) CALR, indicated with blue or orange frames, respectively, after 14 days of differentiation for indicated iPSC clones. To identify MKs, samples were additionally stained for CD42b. Hoechst was added for nuclear staining. Scale bars, 50  $\mu\text{m}$ . Diffuse CALR distribution, clustered localization of CALR at the cell surface, and co-localization of CALR and ER are indicated with yellow, green, and orange arrows, respectively. **B.** Z-stack images of heterozygous *CALR*<sup>ins5</sup>-mutated MKs for indicated staining. Hoechst was added for nuclear staining. Scale bars, 50  $\mu\text{m}$ .

Figure S5.

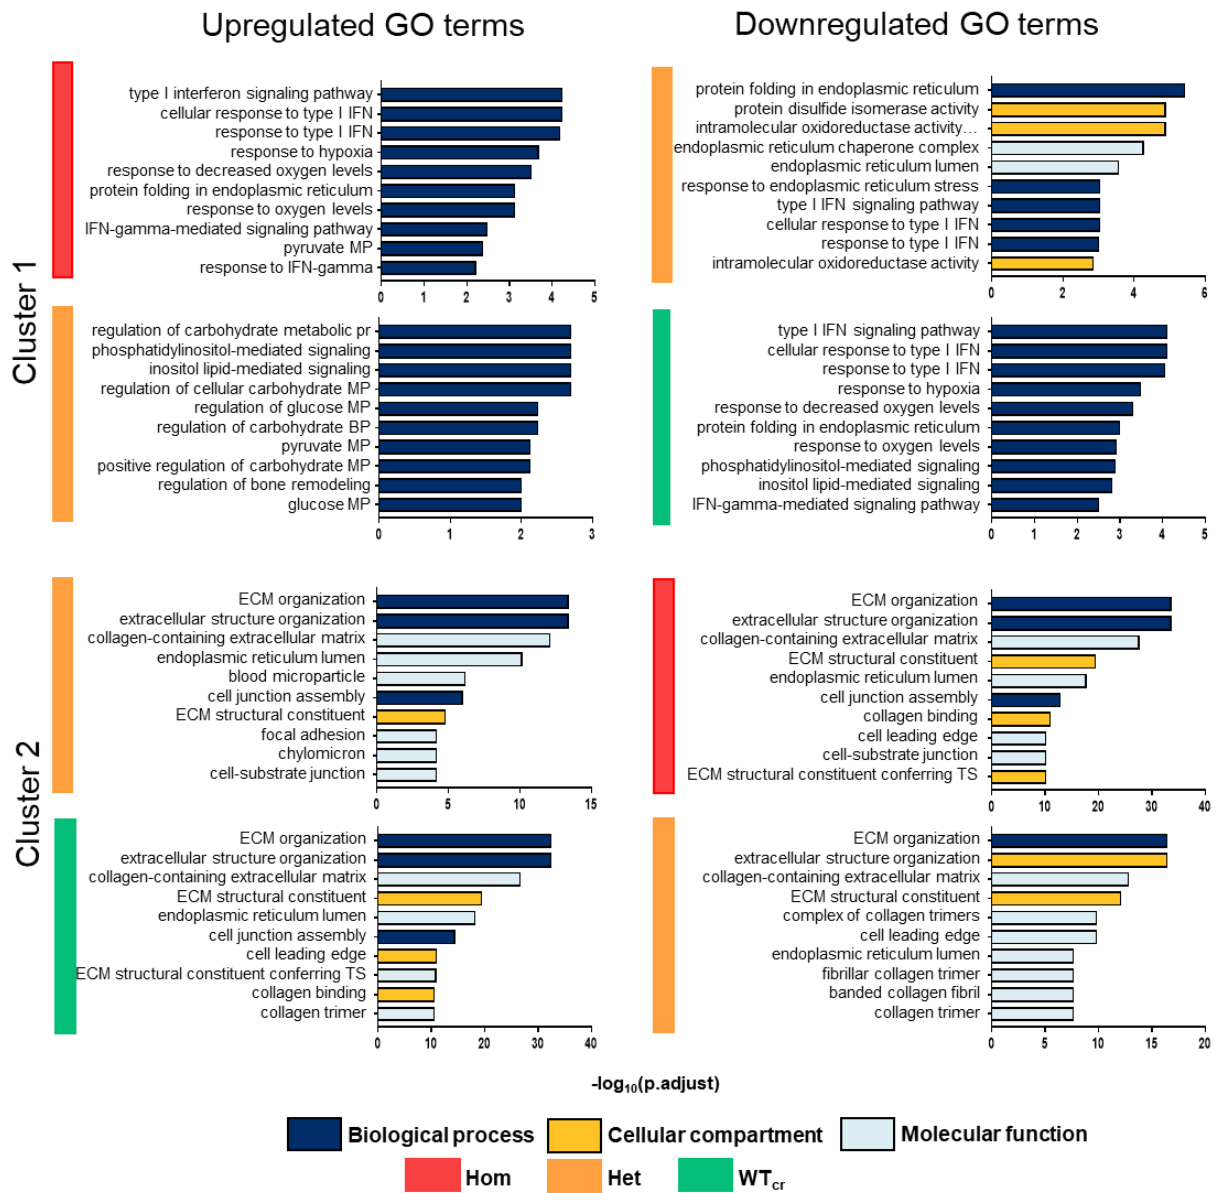

**Figure S5. Gene ontology (GO) analysis of *CALRins5*-mutated iPSC-derived MKs. Related to Figure 7.**

Gene ontology (GO) analysis based on up- and downregulated genes of cluster-wise analysis for the heat map (Figure 7A) shown in the main text. The top 10 GO terms are shown. GO categories biological process, cellular compartment and molecular functions are depicted in dark blue, yellow, and light blue, respectively. Corresponding genotypes are shown in red, orange and green for MKs with homozygous (Hom) or heterozygous (Het) *CALRins5*, or WT<sub>cr</sub> MKs, respectively. BP (biosynthetic process), ECM (extracellular matrix), MP (metabolic process), TS (tensile strength), IFN (interferon).

Figure S6.

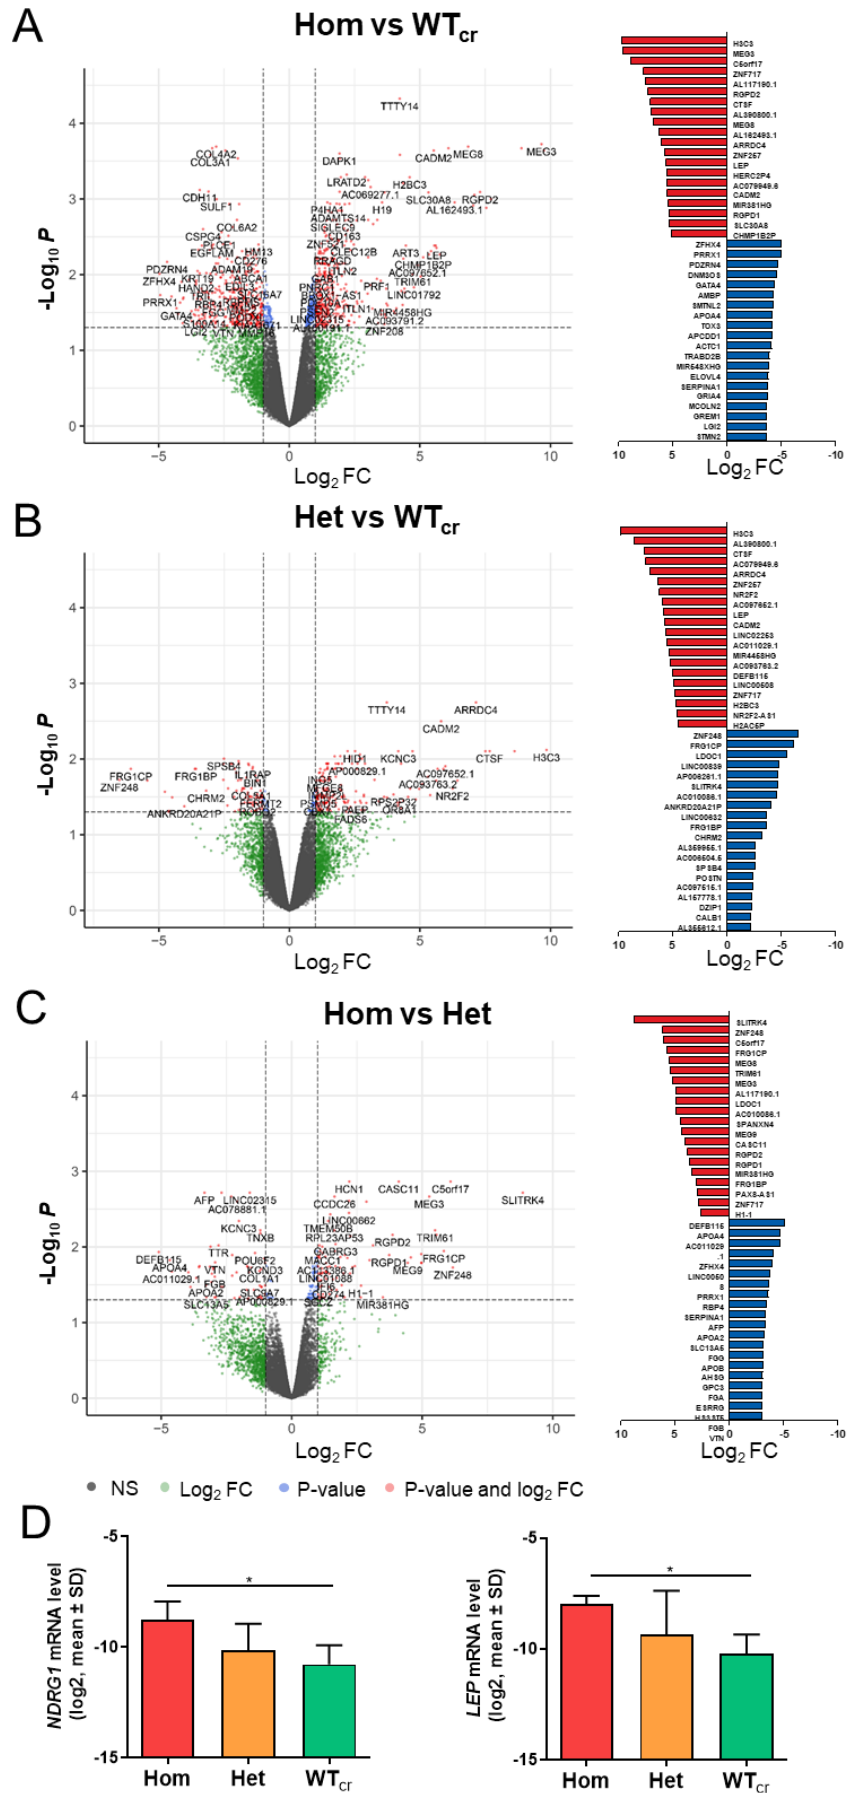

**Figure S6. Differentially expressed genes (DEGs) in *CALRins5*-mutated MKs and *WT<sub>cr</sub>* MKs. Related to Figure 7.**

**A., B., and C.** Volcano plot of differentially expressed genes (DEGs) and list of the top 20 up- and downregulated DEGs among the comparisons: Hom vs *WT<sub>cr</sub>* (**A**), Het vs *WT<sub>cr</sub>* (**B**), and Hom vs Het (**C**) of *CALRins5*-mutated MKs and control. All genes shown in the list of DEGs are significantly regulated ( $p \leq 0.05$ ) Up- and downregulated genes are shown in red and blue, respectively. FC (fold change), Hom (homozygously *CALRins5*-mutated), Het (heterozygously *CALRins5*-mutated). **D.** Validation of RNAseq analysis by RT-qPCR for *NDRG1* and leptin (*LEP*) expression. RT-qPCR was performed for two samples also analyzed in RNAseq and one sample from an additional independent differentiation experiment,  $n=3$  independent experiments,  $*p < 0.05$ . Hom (homozygously *CALRins5*-mutated), Het (heterozygously *CALRins5*-mutated).

### 3. Supplemental Tables

**Table S1. Generation of MPN patient-derived CALR iPSCs**

| Pat. | Diagnosis | CALR mutation | Sample type | Allele burden | iPS clones screened | CALR non-mut clones | CALR Heterozygous clones | CALR homozygous clones |
|------|-----------|---------------|-------------|---------------|---------------------|---------------------|--------------------------|------------------------|
| 1    | pET-MF    | ins5          | PB          | 82%           | 101                 | 0                   | 27                       | 74                     |
| 2    | PMF       | del52         | PB          | 51%           | 64                  | 0                   | 55                       | 9                      |
| 3    | PMF       | del31         | PB          | 37%           | 69                  | 5                   | 64                       | 0                      |

**Table S1.** iPSCs were generated by reprogramming peripheral blood-derived mononuclear cells from three patients carrying *CALR* del52, ins5, or del31 mutation. Individual colonies were picked and screened for *CALR* genotypes by PCR. Abbreviations: CALR, calreticulin; iPSC, induced pluripotent stem cell; non-mut, non-mutant; PMF, primary myelofibrosis; pET-MF, secondary post essential thrombocythemia myelofibrosis. PB, peripheral blood.

**Table S2. CRISPR guide RNAs (gRNAs) to repair homozygous CALR mutations with CRISPR/Cas9. Related to Figure 1.**

| Mutation          | gRNA                        |
|-------------------|-----------------------------|
| <i>CALR</i> ins5  | 5'-AGGCAGAGGACAATTGTCCG -3' |
| <i>CALR</i> del52 | 5'-ACGAGGAGCAGAGGACAAGG-3'  |

**Table S3. Donor template to repair homozygous CALR mutations with CRISPR/Cas9. Related to Figure 1.**

| Mutation          | Donor Template                                                                                                                                                                                      |
|-------------------|-----------------------------------------------------------------------------------------------------------------------------------------------------------------------------------------------------|
| <i>CALR</i> ins5  | 5'-<br>GAGGCTTAAGGAGGAGGAAGAAGACAAGAAACGCAAAGAGGAGGA<br>GGAGGCAGAGGACAAGGAGGATGATGAGGACAAAGATGAGGATGA<br>GGAGGATGAGGAGGACAAGGAGGAAGATGA -3'                                                         |
| <i>CALR</i> del52 | 5'-<br>GTGCTCTGCCTGCAGGCAGCAGAGAAACAAATGAAGGACAAACAG<br>GACGAGGAGCAGAGGCTTAAGGAGGAGGAAGAAGACAAGAAACGC<br>AAAGAGGAGGAGGAGGCAGAGGACAAGGAGGATGATGAGGACAAA<br>GATGAGGATGAGGAGGATGAGGAGGACAAGGAGGAAG -3' |

**Table S4. NGS Data of patient-derived CALR iPSCs and Healthy donor**

| clone     | HD   |      | CALRins5 (K385fs) |      |       |       |       |       | CALRdel52 (L367fs) |      |      |       |       |       | CALRdel31 (E372fs) |           |       |       |
|-----------|------|------|-------------------|------|-------|-------|-------|-------|--------------------|------|------|-------|-------|-------|--------------------|-----------|-------|-------|
|           | HD 4 | HD 6 | WT16              | WT18 | Het04 | Het10 | Hom13 | Hom49 | WT27               | WT30 | WT44 | Het01 | Hom34 | Hom41 | non-mut41          | non-mut48 | Het06 | Het24 |
| CALRins5  |      |      |                   |      | 43    | 41    | 85    | 93    |                    |      |      |       |       |       |                    |           |       |       |
| CALRdel52 |      |      |                   |      |       |       |       |       |                    |      |      | 60    | 97    | 97    |                    |           |       |       |
| CALRdel31 |      |      |                   |      |       |       |       |       |                    |      |      |       |       |       |                    |           | 54    | 55    |

Mutation



**Table S4.** Next generation sequencing (NGS) of patient-derived iPSC clones and healthy donors iPSC clones for clinically relevant MPN mutations. In the analyzed gene list (*ABL1*, *ASXL1*, *BRAF*, *BTK*, *CBL*, *CSF3R*, *CXCR4*, *DNMT3A*, *ETNK1*, *EZH2*, *FLT3*, *IDH1*, *IDH2*, *JAK2*, *KIT*, *KRAS*, *MPL*, *MYD88*, *NF-E2*, *NPM1*, *NRAS*, *PTPN11*, *RUNX1*, *SETBP1*, *SF3B1*, *SH2B3*, *STAT5B*, *TET2*, *TP53*, *U2AF1*, *WT1*) no mutation was found. Percentages represent allele frequency (the fraction of mutant reads per total reads) of indicated mutations.

**Table S5. List of antibodies used for flow cytometry. Related to Figure 2 and Figure 4.**

| Antibody                                   | Company                       | Catalogue number |
|--------------------------------------------|-------------------------------|------------------|
| APC mouse anti-human CD34                  | BD, USA                       | 555824           |
| FITC mouse anti-human CD43                 | BD, USA                       | 555475           |
| PE mouse anti-human CD31                   | BD, USA                       | 555446           |
| FITC anti-human CD61 clone VI-PL2          | BioLegend, USA                | 336404           |
| Anti-human CD117 (ckit)-PE Cy7 clone 104D2 | Thermo Fisher Scientific, USA | 25-1178-42       |
| Anti-human CD235a-PE clone HIR2            | Thermo Fisher Scientific, USA | 12-9987-82       |
| CD45-APC-Vio770 human                      | Miltenyi Biotec, Germany      | 130-113-115      |
| APC anti-human CD42b                       | BioLegend, USA                | 303912           |
| PE/Cyanina7 anti-human CD41                | BioLegend, USA                | 303718           |
| CD45-APC human                             | Beckman Coulter, USA          | IM2473U          |
| CD15-PC5 human                             | Beckman Coulter, USA          | B49217           |
| MPO-FITC human                             | Beckman Coulter, USA          | IM1874           |

**Table S6. List of primary and secondary antibodies used for Western blot and Immunofluorescence. Related to Figure 1 and Figure 6.**

| Antibody                                             | Company                       | Catalogue number |
|------------------------------------------------------|-------------------------------|------------------|
| Monoclonal anti-mutated Calreticulin Rabbit          | Dianova, Germany              | DIA-CAL-250      |
| Monoclonal anti Calreticulin (D3E6) XP Rabbit #12238 | Cell Signaling, USA           | 12238S           |
| Monoclonal GAPDH (0411): sc-32233 Mouse              | Santa Cruz Biotechnology, USA | sc-47724         |
| CD42b Polyclonal Antibody                            | Thermo Fisher Scientific, USA | PA5-90903        |
| Calreticulin Antibody (1G6A7)                        | Novus Biologicals, USA        | 47518SS          |
| Goat anti-rabbit IgG (H+L) Alexa Fluor 555           | Thermo Fisher Scientific, USA | A32732           |
| Goat anti-mouse IgG (H+L) Alexa Fluor 647            | Thermo Fisher Scientific, USA | A32728           |

|                                                  |                               |         |
|--------------------------------------------------|-------------------------------|---------|
| Goat anti-rabbit IgG (H+L) FITC                  | Thermo Fisher Scientific, USA | F-2765  |
| Goat anti-mouse IgM (H+L) Alexa Fluor 594        | Thermo Fisher Scientific, USA | A-11012 |
| Goat anti-mouse Immunoglobulins/HRP, polyclonal  | Dako, USA                     | P0447   |
| Goat anti-rabbit Immunoglobulins/HRP, polyclonal | Dako, USA                     | P0448   |

**Table S7. List of primers used for qPCR and CALR genotyping PCR. Related to Figure 1, Figure 5 and Figure S1.**

| Target name      |                     | Sequence                 | Reference                   |
|------------------|---------------------|--------------------------|-----------------------------|
| <b>qPCR</b>      |                     |                          |                             |
| <i>CALRdel52</i> | Non-.mut allele FRW | CAGGACGAGGAGCAGAGACT     |                             |
|                  | Mutant allele FRW   | ACAGGACGAGGAGCAGAGAAC    |                             |
|                  | Common Rev          | GCCTCTCTACAGCTCGTCCTTG   |                             |
| <i>CALRdel31</i> | Non-.mut allele FRW | CAAGTCTGGCACCATCTTTG     |                             |
|                  | Mutant allele FRW   | TCCTCTTTGCGTTTCTTGTC     |                             |
|                  | Common Rev          | ATCCTCCTTGTCTCTGTTC      |                             |
| <i>CALRins5</i>  | common FRW          | CAAGTCTGGCACCATCTTTG     |                             |
|                  | Non-mut allele Rev  | TGTCCTCATCATCCTCCTTG     |                             |
|                  | mutant Rev          | TGTCCTCATCATCCTCCGAC     |                             |
| <i>ETS1</i>      | FRW                 | TCGATCTCAAGCCGACTCTC     |                             |
|                  | REV                 | CATTCACAGCCACATCACC      |                             |
| <i>FLI1</i>      | FRW                 | GTGCTGTTGTACACCTCAG      |                             |
|                  | REV                 | TACTGATCGTTTGTGCCCT      |                             |
| <i>GAPDH</i>     | FRW                 | GTTGAGGTCAATGAAGGGGTC    |                             |
|                  | REV                 | GACCTCAACTACATGGTGAGTTGC |                             |
| <i>GATA1</i>     | FRW                 | GGGATCACACTGAGCTTGC      | (Szabo et al., 2010)        |
|                  | REV                 | ACCCCTGATTCTGGTGTGG      |                             |
| <i>GFI1B</i>     | FRW                 | AGTTCTGCGGCAAGCGTTTCCA   |                             |
|                  | REV                 | TTTCCGCACACCTGGCACTTGT   |                             |
| <i>Ki67</i>      | FRW                 | CAGACCCATTTACTTGTGTTGGA  |                             |
|                  | REV                 | ACGCCTGGTTACTATCAAAAGG   |                             |
| <i>LEP</i>       | FRW                 | CGGTAAGGAGAGTATGCGGG     |                             |
|                  | REV                 | ACCAGAAAGAGTGGAGCCT      |                             |
| <i>LOX1</i>      | FRW                 | GCATACAGGGCAGATGTCAGA    |                             |
|                  | REV                 | TTGGCATCAAGCAGGTCATAG    |                             |
| <i>MPL</i>       | FRW                 | CTGCCACTTCAAGTCACGAA     |                             |
|                  | REV                 | CTGCCACTCCAATTCCAGAT     |                             |
| <i>MPO</i>       | FRW                 | CCGGGATGGTGATCGGTTTT     | (Theocharides et al., 2016) |
|                  | REV                 | CAGATGATCCGGGGCAATGA     |                             |
| <i>MT-ATP6</i>   | FRW                 | CGTACGCCTAACCGCTAACA     |                             |
|                  | REV                 | AGGCGACAGCGATTTCTAGG     |                             |
| <i>NRDG1</i>     | FRW                 | GACAAAGGCCAAAAGGTCAACA   |                             |

|                                           |                    |                         |  |
|-------------------------------------------|--------------------|-------------------------|--|
|                                           | REV                | CCATTTTCATTGGGAGGGTGGT  |  |
| <i>NFE2</i>                               | FRW                | CTGTGACTCCACCACAGGTTT   |  |
|                                           | REV                | TGAGCAGGGGCAGTAAGTTG    |  |
| <i>RUNX1</i>                              | FRW                | CCGAGAACCTCGAAGACATC    |  |
|                                           | REV                | GTCTGACCCTCATGGCTGT     |  |
| <i>vWF</i>                                | FRW                | CAACACCTGCATTTGCCGAA    |  |
|                                           | REV                | TGACCTGTGACAAGGCACTC    |  |
| <b>Genotyping PCR</b>                     |                    |                         |  |
| <i>CALRdel52 r</i>                        | FRW                | ACAACCTTCCTCATCACCAACG  |  |
| <i>CALRdel31</i>                          | REV                | GGCCTCAGTCCAGCCCTG      |  |
| <b>Gentotyping allele specific PCR</b>    |                    |                         |  |
| <i>CALRins5</i>                           | common FRW         | TAACTGCAGTGTCAGCGGTG    |  |
|                                           | Non-mut allele Rev | TGTCCTCATCATCCTCCTTG    |  |
|                                           | mutant Rev         | TGTCCTCATCATCCTCCGAC    |  |
| <b>PCR for CRISPR-off target products</b> |                    |                         |  |
| <i>CANX</i>                               | FRW                | ACACGTCTTCAGGGTAGGA     |  |
|                                           | REV                | CAACATCGTAGGGTCTTGGCT   |  |
| <i>RABL6</i>                              | FRW                | GCAAAGAGGTAAGTGGCTACTCC |  |
|                                           | REV                | CGGCCTAGAGCTCCTCGTA     |  |
| <i>BASP1P1</i>                            | FRW                | GGCGGAGCTAGCACTACAAC    |  |
|                                           | REV                | GGTGACTTCGGCAGCTTTGG    |  |
| <i>IGSF10</i>                             | FRW                | AAGTGAGTGAACCCAGGCAC    |  |
|                                           | REV                | AGCTTTGGGGAAGGTGATGG    |  |
| <i>IGSF5</i>                              | FRW                | TAGAGATTCTGGTTCCTGGG    |  |
|                                           | REV                | TCCACCGCCACGTCCTAGATT   |  |
| <i>GRIN2B</i>                             | FRW                | TCACCACACACGCTACTTCCAC  |  |
|                                           | REV                | TTTACAGAGAAGGCTGGCCG    |  |
| <i>GLOD5</i>                              | FRW                | CCTTCCATTTGCACTACCTACCT |  |
|                                           | REV                | CCCTGGCTAAACTGGGGGAG    |  |
| <i>LOC105371816</i>                       | FRW                | TCTTGGAGACAGACTGCTGG    |  |
|                                           | REV                | GTGTGGGGTCTGATGCTTTA    |  |

**Table S8. Medium composition. Related to Figure 2, Figure 3 and Figure 4.**

| <b>SFM Medium for “spin-EB” differentiation</b> |                                      |                               |
|-------------------------------------------------|--------------------------------------|-------------------------------|
| 50 %                                            | IMDM                                 | Thermo Fisher Scientific, USA |
| 50 %                                            | Ham’s F-12 Nutrient Mixture          | Thermo Fisher Scientific, USA |
| 0.5 %                                           | Human Plasbumin 20                   | Grifols, Germany              |
| 2 mM                                            | GlutaMAX                             | Thermo Fisher Scientific, USA |
| 2 mM                                            | Chemically Defined Lipid Concentrate | Thermo Fisher Scientific, USA |
| 50 µg/ml                                        | L-ascorbic acid                      | Stemcell Technologies, Canada |
| 6 µg/ml                                         | Transferrin                          | Merck, Germany                |
| 400 µM                                          | 1-Thioglycerol                       | Merck, Germany                |

| <b>EB medium for EB-based differentiation</b> |                                  |                               |
|-----------------------------------------------|----------------------------------|-------------------------------|
|                                               | IMDM                             | Thermo Fisher Scientific, USA |
| 15 %                                          | FBS                              | Pan Biotech, Germany          |
| 1U/ml                                         | Penicillin                       | Thermo Fisher Scientific, USA |
| 100 mg/ml                                     | Streptomycin                     | Thermo Fisher Scientific, USA |
| 2 mM                                          | L-Glutamine                      | Thermo Fisher Scientific, USA |
| 5 %                                           | Protein-Free Hybridoma Medium-II | Thermo Fisher Scientific, USA |

|                |                          |                               |
|----------------|--------------------------|-------------------------------|
| 0.1 mM         | $\beta$ -mercaptoethanol | Thermo Fisher Scientific, USA |
| 50 $\mu$ g/ml  | L-Ascorbic acid          | Sigma Aldrich, Germany        |
| 175 $\mu$ g/ml | hTransferrin             | Sigma Aldrich, Germany        |

| <b>Progenitor medium for EB-based differentiation</b> |                               |                               |
|-------------------------------------------------------|-------------------------------|-------------------------------|
|                                                       | StemPro 34 SFM                | Thermo Fisher Scientific, USA |
| 2 mM                                                  | L-Glutamine                   | Thermo Fisher Scientific, USA |
| 1U/ml                                                 | Penicillin                    | Thermo Fisher Scientific, USA |
| 100 mg/ml                                             | Streptomycin                  | Thermo Fisher Scientific, USA |
| 1X                                                    | MEM Non-Essential Amino Acids | Thermo Fisher Scientific, USA |

### 3. Supplemental experimental procedures

#### Next generation sequencing

For the detection of mutations from gDNA by next generation sequencing (NGS), two panels individually designed and validated for routine hematology diagnostic were used. Either 250ng or 75ng of gDNA were used for library preparation with either a Truseq Custom Amplicon Kit (Illumina, San Diego, USA) or an Ampliseq for Illumina Custom Panel (Illumina) covering the relevant regions of either 31 (*ABL1*, *ASXL1*, *BARD1*, *CALR*, *CBL*, *CHEK2*, *CSF3R*, *DNMT3A*, *ETNK1*, *ETV6*, *EZH2*, *IDH1*, *IDH2*, *JAK2*, *KIT*, *KRAS*, *MPL*, *NFE2*, *NRAS*, *PDGFRA*, *PTPN11*, *RUNX1*, *SETBP1*, *SF3A1*, *SF3B1*, *SH2B3* (*LNK*), *SRSF2*, *TCF12*, *TET2*, *TP53*, *U2AF1*) (Kirschner et al., 2018) or 32 genes (*ABL1*, *ASXL1*, *BRAF*, *BTK*, *CALR*, *CBL*, *CSF3R*, *CXCR4*, *DNMT3A*, *ETNK1*, *EZH2*, *FLT3*, *IDH1*, *IDH2*, *JAK2*, *KIT*, *KRAS*, *MPL*, *MYD88*, *NFE2*, *NPM1*, *NRAS*, *PTPN11*, *RUNX1*, *SETBP1*, *SF3B1*, *SH2B3*, *STAT5B*, *TET2*, *TP53*, *U2AF1*, *WT1*) associated with hematologic malignancies. The final libraries were sequenced with 2x250bp on a MiSeq (Illumina). The MiSeq onboard software was used (Real time analysis software v1.18.54, Illumina) for demultiplexing and FastQ file generation. Alignment and variant calling were performed with the SeqNext-Module of the SeqPilot-Software (JSI medical systems, Version 4.4.0 Build 509). Variants were called with a bidirectional frequency of >5% (*JAK2* V617F and *KIT* D816V >1%) and reviewed manually.

#### Cytogenetic analysis

Patient-derived iPSC clones were seeded on matrigel coated 25 cm<sup>2</sup> cell culture flasks. Normal chromosomal constitution was verified by conventional karyotyping of iPSC clones by means of GTG banding at 400 to 550 band level. Metaphase spreads were prepared using standard procedures of blocking cell division at metaphase, hypotonic treatment, and methanol/acetic acid fixation (3:1). The banding techniques included the use of a trypsin pretreatment (GTG-banding) carried out according to standard protocols. Microscopy was performed with Axioplan fluorescence microscope (Carl Zeiss) and IKARUSTM digital imaging systems (MetaSystems, Altlusheim, Germany). An average of 20 mitoses were analyzed for each clone.

#### Immunofluorescence staining

iPSC colonies were cultured on Matrigel coated coverslips in 4-well-plates. Cells were fixed with 4 % paraformaldehyde (Sigma Aldrich) and blocked with goat serum (Merck Millipore, Darmstadt, Germany). In order to detect the expression of pluripotent markers and mutant *CALR*, cells were incubated with following primary antibodies at 4 °C overnight: TRA-1-60 (Merck Millipore), OCT3/4 (H-134, Santa Cruz, CA, USA) or mouse monoclonal antibody *CAL2* (Dianova, Hamburg, Germany). Cells were washed three times with PBS on the next day and

incubated with corresponding secondary antibodies goat anti-rabbit IgG (H+L) FITC (Thermo Fisher Scientific), goat anti-mouse IgM (H) Alexa Fluor 594 (Thermo Fisher Scientific) or goat anti-mouse IgG Alexa Fluor 647 (for CALR mutant, clone poly4053, BioLegend, San Diego, CA, USA) for 1 h in the dark. Nuclei were stained with DAPI (Vector Laboratories, Burlingame, CA, USA) and coverslips were mounted with Dako Fluorescence Mounting Medium (Dako, Jena, Germany). Fluorescent image analysis was performed using an Axiovert 200 microscope (Carl Zeiss, Jena, Germany) and IPLab Spectrum software (BD, Franklin Lakes, USA).

In order to detect localization of WT and mutant CALR in MKs, cells were fixed with 3,7 % PFA, washed with PBS and permeabilized with 0,1 % Triton-X and 2,5 % BSA. Afterwards cells were incubated with detection reagent for ER-staining and Hoechst (Enzo Life Sciences, Farmingdale, USA) for 20 min at 37°C. Cells were washed with PBS and blocked with 5 % BSA in PBS. Cells were incubated with the following primary antibodies at 4 °C overnight: polyclonal antibody CD42b (Thermo Fisher Scientific) and mutant CALR antibody (Dianova) or WT CALR monoclonal antibody (Novus, Littleton, USA). On the next day, cells were washed with PBS and incubated with corresponding secondary antibodies goat anti-rabbit IgG Alexa Fluor 555 (H+L) and goat anti-mouse IgG (H+L) Alexa Fluor 647 (all Thermo Fisher Scientific) for 1 h at RT. Coverslips were mounted with Fluorescence Mounting Medium (Dako, Carpinteria, USA). Fluorescent image analysis was performed using a confocal Scanning Microscope (LSM 710) microscope and Zeiss 2012 software (both Carl Zeiss, Jena, Germany).

### **RNA isolation and RT-qPCR**

RNA of iPSCs and iPS-cell derived CD34+ HSPCs and CD61+ MKs was isolated using the RNeasy Mini Kit (QIAGEN GmbH, Hilden, Germany) according to manufacturer's protocol. RNA (500 ng) was used for cDNA synthesis. Quantitative RT-qPCR was performed using the 7500 Fast Real-time PCR System (Applied Biosystems by Life technologies, Paisley, UK) with the SYBR Select Master Mix for CFX (Applied Biosystems). The sequences of primers used for-qPCR are listed in Table S7. All primers were purchased from Eurofins-MWG biotech (Ebersberg, Germany). The mRNA expression level of the target gene is determined in % of *GAPDH* or *MT-ATP6*.

### **SDS-page and Western blot**

SDS-Page and Western blot analysis were conducted as previously described (Han et al., 2016). Primary and secondary antibodies are listed in Table S6.

## **Undirected hematopoietic differentiation of iPSCs into hematopoietic progenitors and myeloid subsets with the “EB-based” protocol**

iPSCs were cultured on irradiated mouse embryonic fibroblast feeder layer in KnockOut-DMEM based iPSC medium. More detailed information regarding cell culture conditions can be found in Table S8.

For the generation of iPSC-derived CD34<sup>+</sup> HSPCs, CALR iPSCs were subjected to mesoderm commitment and hematopoietic differentiation with an embryonic body (EB)-based protocol modified from the differentiation method described by Kovarova and colleagues (Kovarova and Koller, 2012). CD34<sup>+</sup> HSPCs were cultured and differentiated into myeloid subsets in the StemPro 34 SFM medium (Thermo Fisher Scientific) based progenitor medium at the maximum density of 1x10<sup>6</sup> cells/ml. Details of EB and HSPCs differentiation media are provided in Table S8.

## **Differentiation of iPSCs into hematopoietic stem cells and myeloid subsets with the “spin-EB” protocol**

Feeder-free iPSC culture was maintained on matrigel coated 6-well plates and routinely passaged with 1 ml accutase or 0.5 mM EDTA (Thermo Fisher Scientific). To enhance single cell survival, 10 μM ROCK inhibitor Y-27632 was added to the maintenance culture medium StemMACs iPS Brew XF for 24 h after seeding. iPSC medium was changed daily.

Human iPSCs were differentiated into HSPCs, MKs and erythrocytic cells adapted from the differentiation protocol by Liu et. al (Liu et al., 2015). Briefly, iPSCs were seeded into U-bottom-shaped 96-well plates with a density of 3,000 cells/well in cytokine supplemented serum-free medium (SFM). To allow spheroid formation, plates were spun at 380 g for 5 min. From day 2 to day 8, cells were cultured in SFM with 10 ng/ml VEGF (Miltenyi Biotec), 10 ng/ml BMP4 (Miltenyi Biotec), 10 ng/ml bFGF (Peprotech, Hamburg, Germany) and SCF (0.5 % supernatant of SCF secreting CHO KLS cells). From day 8 onwards, BMP4 and VEGF were removed from the medium. On day 11, 20 ng/ml TPO (Miltenyi Biotec) was added to the medium. On day 14, cells were harvested and filtered through a 100 μm filter to separate the EBs from the suspension cells. Single cells were analyzed by flow cytometry and purified for CD61<sup>+</sup> and CD34<sup>+</sup> cell fractions. More detailed information on SFM Medium is given in Table S8.

## **Cell morphology analysis**

Phase contrast images of iPSC generation and differentiation were obtained with EVOS FL microscope (Thermo Fisher Scientific). To characterize the morphologies of iPSC-derived precursors and myeloid subsets, cells were spun onto slides with Shandon Cytospin 4

cytocentrifuge (Thermo Fisher Scientific) and stained with Diff Quik solution 1 and 2 (Medion Diagnostics, Dürdingen, Switzerland) after methanol fixation. Images were acquired using a Leica DMRX microscope and Leica Application Suite software (Leica Microsystems).

### **MPO cytochemical staining**

In order to evaluate MPO functional activity, iPSC-derived hematopoietic cells at differentiation day 15 were centrifuged onto slides and fixed with LEUCOGNOST® Fixing Mixture. The fixed cells were stained with LEUCOGNOST® POX Kit according to the manufacturer's instructions. Counterstaining of nucleus was performed using Mayer's hemalum solution and slides were mounted with Kaiser's glycerol gelatin (the Kit and all reagents were obtained from Merck Millipore). Images were acquired as described above.

### **Flow cytometry analysis**

To evaluate cell surface progenitor and lineage specific markers, single cells were analyzed on day 10, day 12 and day 14 of "spin-EB" differentiation and on day 10 and day 15 of "EB-based" differentiation. Cells were harvested and passed through a 100 µm cell strainer, centrifuged at 350 g for 5 min. After washing with ice cold FACS buffer, single cells were incubated with lineage-specific antibodies at 4°C for 30 min. Stained cells were resuspended in 300 µl FACS buffer and analyzed on a FACS Canto II (BD). All staining and washing steps were performed in FACS buffer consistent of PBS supplemented with 2 mM EDTA and 2 % BSA (PAN Biotech, Aidenbach, Germany).

To identify the intracellular MPO expression, differentiated hematopoietic cells at day 15 of "EB-based" differentiation were fixed and permeabilized using Fix & Perm Cell Permeabilization Kit (Thermo Fisher Scientific). Cells were firstly stained for cell surface markers CD15 and CD45 for 20 min at room temperature (RT), followed by intracellular MPO staining for 20 min at RT after fixation and permeabilization. Stained cells were evaluated by Gallios flow cytometer (Beckman Coulter, Krefeld, Germany). All data were analyzed by FlowJo™ (version 10, Oregon, USA).

Full list of antibodies is summarized in Table S5. In each experiment matched Ig isotype controls were used to set background fluorescence.

### **CRISPR/Cas9-mediated repair of homozygous *CALRins5* and *CALRdel52* mutation in iPSCs**

The Alt-R™ CRISPR-Cas system (Integrated DNA Technologies IDT, Coralville, USA) was used to efficiently correct homozygous *CALRins5* or *CALRdel52* mutations in MPN patient-specific iPSCs. For precise editing the Alt-R® S.p HiFi Cas9 Nuclease V3 was used together with a single-stranded donor template to repair the double strand break by the cellular



repair mechanisms of homology directed repair (HDR). In brief, guide RNA composing of crRNA and tracrRNA was combined with HiFi. Cas9 Nuclease to assemble the CRISPR-Cas9 ribonucleoprotein complex. Singularized iPSCs were gently mixed with the ribonucleoprotein complex, single-stranded donor template, and electroporation enhancer. Nucleofection was performed using the 4D Nucleofector™ X-Unit and the P3 Primary Cell 4D-Nucleofector™ X, Kit S (both from Lonza, Basel, Switzerland). HDR was stimulated by HDR enhancer (IDT, Coralville, USA). After nucleofection, iPSCs were seeded on previously coated Laminin 521 (Biolamina, Sundbyberg, Sweden) plates to support cell viability in StemMACS™ iPS-Brew XF (Miltenyi Biotec, Bergisch Gladbach, Germany) supplemented with 10 μM of Rock inhibitor Y-27632 and 1x CloneR (Stemcell Technologies). Repair of *CALRins5* and *CALRdel52* mutation was verified by allele-specific or flanking PCR, respectively, and proofed by Sanger sequencing and Western blot. Possible off-target effects were excluded by PCR reaction of off-target sites and subsequent Sanger sequencing. Sequences of crRNA, donor template and primers are provided in Table S2 and 3.

### **Purification of CD34+ HSPCs and CD61+ megakaryocytes by magnetic activated cell sorting**

On day 25-35 of “EB-based” differentiation and on day 14 of “spin-EB” differentiation anti-CD34 and anti-CD61 MicroBeads (Miltenyi Biotec, Bergisch Gladbach, Germany) were used to separate HSPCs and MKS, respectively. Purification of cells was performed according to the protocol provided by the manufacturer. In brief, single cell suspension was incubated with CD61 or CD34 MicroBeads for 15 or 30 min, respectively, to label the cells magnetically. Cell suspension was loaded onto a LS column installed in a magnetic field. After washing three times with MACS buffer consisting of PBS supplemented with 5 % FCS (Thermo Fisher Scientific) and 2 mM EDTA to remove unbound cells, the column was removed from the magnetic field and positively selected cell fraction was eluted with 5 ml of MACS buffer from the column. After centrifugation at 300 g for 10 min, purified cells were counted and further processed. CD61+ MKs and CD34+ HSPCs were either snap frozen for RT-qPCR or used for transmission electron microscopy or seeded in Colony-Forming Unit Assay, respectively.

### **Colony-forming unit assay of CD34+ HSPCs**

Purified CD34+ cells were seeded in MethoCult™ (Stemcell Technologies) supplemented with 20 ml IMDM (Thermo Fisher Scientific), 50 ng/ml hSCF, 10 ng/ml hIL-3, 10 ng/ml hGMSCF and 14 ng/ml hEPO (all ImmunoTools Friesoythe; Germany) in a cell density of 5,000 cells/ml. After 10-12 days of culture at 37° C, colonies were identified and counted based on morphology using light microscopy (Motic, Barcelona, Spain).

## **Transmission electron microscopy**

iPSC-derived CD61+ megakaryocytes at day 14 of “spin-EB” differentiation were prepared as described previously. Purified MKs were washed with PBS and fixed with 3 % glutaraldehyde for at least 2 h at RT, followed by embedding in 5 % low melting agarose (Merck). Gelatinated blocks were washed in 0.1 M Soerensen’s phosphate buffer (Merck) and post-fixed in 17 % sucrose buffer (Merck) containing 1 % OsO<sub>4</sub> (Roth, Karlsruhe, Germany). Subsequently, specimens were dehydrated performing an ascending ethanol series repeating the last step for three times (30, 50, 70, 90, and 100 % ethanol; 10 min each step). Dehydrated samples were consecutively incubated in propylene oxide (Serva, Heidelberg Germany) for 30 min, in a mixture of EPON resin (Serva) and propylene oxide (1:1) for 1 h, and in pure EPON for 1 h. EPON polymerization was conducted at 90 °C for 2 h. Ultrathin sections of 70–100 nm were cut with a Reichert Ultracut S ultramicrotome (Leica, Wetzlar, Germany) equipped with a diamond knife (Leica) and picked up on copper–rhodium grids (Plano, Wetzlar, Germany). Contrast was enhanced by staining with 0.5 % uranyl acetate and 1 % lead citrate (both EMS, Munich, Germany). Samples were viewed at an acceleration voltage of 60 kV using a Zeiss Leo 906 (Carl Zeiss, Jena, Germany) transmission electron microscope. Image processing and analysis was performed using ImageJ (Schneider et al., 2012).

## **Preparation of samples for RNA Sequencing**

RNA of purified CD61+ MKs was isolated as described in Supplementary Information. Quality was verified by TapeStation 4200 (Agilent, Santa Clara, USA) to determine RNA integrity number (RIN). RNA concentration was measured with Fluorometer Quantus™ (Promega, Fitchburg, USA). According to manufacturer’s protocol, ribosomal RNA was depleted using NeBNext® rRNA Depletion Kit, prior to library preparation with NeBNext®Ultra™II Directional RNA Library Prep Kit for Illumina (both New England BioLabs, Ipswich, USA) using an RNA input of 100 ng per sample (New England BioLabs, Ipswich, USA). Subsequently, samples were sequenced in paired end reads (2x76 bp, dual indexed) on two NextSeq High Output Kits v2.5 (150 cycles) on a NextSeq 500 instrument (both Illumina, San Diego, USA) to have sufficient reads for data analysis.

#### 4. References

Han, L., Schubert, C., Köhler, J., Schemionek, M., Isfort, S., Brümmendorf, T.H., Koschmieder, S., and Chatain, N. (2016). Calreticulin-mutant proteins induce megakaryocytic signaling to transform hematopoietic cells and undergo accelerated degradation and Golgi-mediated secretion. *J. Hematol. Oncol.* 9, 1–14.

Kirschner, M., Maurer, A., Wlodarski, M.W., Ventura Ferreira, M.S., Bouillon, A.-S., Halfmeyer, I., Blau, W., Kreuter, M., Rosewich, M., Corbacioglu, S., et al. (2018). Recurrent somatic mutations are rare in patients with cryptic dyskeratosis congenita. *Leukemia* 32, 1762–1767.

Kovarova, M., and Koller, B. (2012). Differentiation of mast cells from embryonic stem cells. *Curr. Protoc. Immunol.*

Liu, Y., Wang, Y., Gao, Y., Forbes, J.A., Qayyum, R., Becker, L., Cheng, L., and Wang, Z.Z. (2015). Efficient Generation of Megakaryocytes From Human Induced Pluripotent Stem Cells Using Food and Drug Administration-Approved Pharmacological Reagents. *Stem Cells Transl. Med.* 4, 309–319.

Schneider, C.A., Rasband, W.S., and Eliceiri, K.W. (2012). NIH Image to ImageJ: 25 years of image analysis. *Nat. Methods* 9, 671–675.

Szabo, E., Rampalli, S., Risueño, R.M., Schnerch, A., Mitchell, R., Fiebig-Comyn, A., Levadoux-Martin, M., and Bhatia, M. (2010). Direct conversion of human fibroblasts to multilineage blood progenitors. *Nature* 468, 521–526.

Theocharides, A.P.A., Lundberg, P., Lakkaraju, A.K.K., Lysenko, V., Myburgh, R., Aguzzi, A., Skoda, R.C., and Manz, M.G. (2016). Homozygous calreticulin mutations in patients with myelofibrosis lead to acquired myeloperoxidase deficiency. *Blood* 127, 3253–3259.
